# Supplementary material
Source: Royal Society of Chemistry journal article supplement (https://www.rsc.org/suppdata/cp/1999/5565/pccp-sup-ap.doc)
Supplement: Supplementary file 1 [file pccp-sup-ap.doc]

**Supplementary Data (Appendices C to F):**

**Appendix C**. **Overall First-Derivative Generating Functions**

Since complexity of the formulas increases with the order of the derivative, it is beneficial to abbreviate the notation for the first-derivative generating functions even further. Arguments tn, sn are abbreviated to **t**n, so that e. g. Sg(i)(t,s) is represented simply by Sg(i)(**t**). For molecular structures where the center is a site (rather than a bond) one has

P2g(i)(**t**) = t{ P2g,i(**t**) + [ **Z**4(i)[Sg;**t**] + S<g(i)(**t**) **Z**3[Sg;**t**] + S<g(**t**) **Z**3(i)[Sg;**t**]

+ **Z**2(i) [Sg;**t**] **Z**2[S<g;**t**] + **Z**2[Sg;**t**] **Z**2(i)[S<g;**t**] ] + (SH)2[ **Z**2(i)[Sg;**t**] ]

+ SH [ **Z**3(i)[Sg;**t**] + **Z**2(i)[Sg;**t**] S<g(**t**) + **Z**2[Sg;**t**] S<g(i)(**t**) ] +

+ [ **Z**2(i)[Sg;**t**] Dg(**t**) + **Z**2[Sg;**t**] Dg(i)(**t**) +

+ (Sg(i)(**t**) S<g(**t**) + Sg(**t**) S<g(i)(**t**)) Dg(**t**) + Sg(**t**) S<g(**t**) Dg(i)(**t**) ] +

+ SH [ Sg(i)(**t**) Dg(**t**) + Sg(**t**) Dg(i)(**t**) ] + [ **Z**2(i)[Dg;**t**] ] +

+ [ Sg(i)(**t**) Tg(**t**) + Sg(**t**) Tg(i)(**t**)] } . (C.1)

Here the **Z**n(i) are also derivatives with respect to ui and are given as

**Z**4(i)[Sg;**t**] = (1/24){4(Sg(**t**))3 Sg(i)(**t**) + 6[(Sg(**t**))22Sg(i)(**t**2) + 2Sg(**t**) Sg(i)(**t**) Sg(**t**2)] + 8[Sg(**t**)3Sg(i)(**t**3) + Sg(i)(**t**)Sg(**t**3)] + 6Sg(**t**2)2Sg(i)(**t**2) + 64Sg(i)(**t**4) }, (C.2)

**Z**3(i)[Sg;**t**] = (1/6){3(Sg(**t**))2 Sg(i)(**t**) + 3[Sg(**t**)2Sg(i)(**t**2) + Sg(i)(**t**) Sg(**t**2)] +

+ 23Sg(i)(**t**3) }, (C.3)

**Z**2(i)[Sg;**t**] = (1/2){ 2Sg(**t**) Sg(i)(**t**) + 2Sg(i)(**t**2) } , (C.4)

The analytical expression for the first-derivative generating function P2g-1(i)(**t**) (when the center is a bond) is

P2g1(i)(**t**) = **Z**2(i)[Sg;**t**] + **Z**2(i)[Dg;**t**] + **Z**2(i)[Tg;**t**] . (C.5)

The analytical expressions for the auxilliary first-derivative generating functions Sg+1(i)(**t**), Dg+1(i)(**t**), and Tg+1(i)(**t**) that appear in expressions for P2g(i)(**t**) and P2g-1(i)(**t**) are given below.

**Appendix D. Recursion Relations for First-Derivative Generating**

**Functions for “rooted” trees**

From the zero-moment generation function (generation g+1), one obtains recursion relations from eq. (A.1)-(A.9) for the first-moment generating functions

Sg+1(i)(**t**) = t{ Sg+1,i(**t**) + **Z**3(i)[Sg;**t**] + Sg(**t**) **Z**2(i)[S<g;**t**] + Sg(i)(**t**) Z2[S<g;**t**] +

+ S<g(**t**) **Z**2(i)[Sg;**t**] + S<g(i)(**t**) Z2[Sg;**t**] + SH **Z**2(i)[Sg;**t**] +

+ SH (Sg(**t**) S<g(i)(**t**) + S<g(**t**) Sg(i)(**t**)) + (SH)2Sg(i)(**t**) +

+ ( Sg(i)(**t**) + S<g(i)(**t**)) Dg(**t**) + ( Sg(**t**) + S<g(**t**)) Dg(i)(**t**) +

+ SH Dg(i)(**t**) + Tg(i)(**t**) } ; (D.1)

Dg+1(i)(**t**) = t { Dg+1,i(**t**) + **Z**2(i)[Sg;**t**] + [Sg(**t**) S<g(i)(**t**) + S<g(**t**) Sg(i)(**t**)]

+ SH  Sg(i)(**t**) + Dg(i)(**t**) } ; (D.2)

Tg+1(i)(**t**) = t { Tg+1,i(**t**) + Sg(i)(**t**) } ; (D.3)

Now, we proceed with the second-derivative generation functions.

**Appendix E. Overall Second-Derivative Generating Functions**

For the center-site structures (D=2g) representing second-derivative generating functions one has

P2g(i,j)(**t**) = t { P2g,i(j)(**t**) + P2g,j(i)(**t**) + [ **Z**4(i,j)[Sg;**t**] + S<g(i,j)(**t**) **Z**3[Sg;**t**]

+ S<g(i)(**t**) **Z**3(j)[Sg;**t**] + S<g(j)(**t**) **Z**3(i)[Sg;**t**] + S<g(**t**) **Z**3(i,j)[Sg;**t**] + **Z**2(i,j)[Sg;**t**] **Z**2[S<g;**t**]

+ **Z**2(i)[Sg;**t**] **Z**2(j)[S<g;**t**] + **Z**2(j)[Sg;**t**] **Z**2(i)[S<g;**t**] + **Z**2[Sg;**t**] **Z**2(i,j)[S<g;**t**] ]

+ SH [ **Z**3(i,j)[Sg;**t**] + **Z**2(i,j)[Sg;**t**] S<g(**t**) + **Z**2(i)[Sg;**t**] S<g(j)(**t**)

+ **Z**2(j)[Sg;**t**] S<g(i)(**t**) + **Z**2[Sg;**t**] S<g(i,j)(**t**)] + [SH2 **Z**2(i,j)[Sg;**t**] ]

+ [**Z**2(i,j)[Sg;**t**] Dg(**t**) + **Z**2(i)[Sg;**t**] Dg(j)(**t**) + **Z**2(j)[Sg;**t**] Dg(i)(**t**) + **Z**2[Sg;**t**] Dg(i,j)(**t**)]

+ [**Z**2(i,j)[Sg;**t**] D<g(**t**) + **Z**2(i)[Sg;**t**] D<g(j)(**t**) + **Z**2(j)[Sg;**t**] D<g(i)(**t**)+ **Z**2[Sg;**t**] D<g(i,j)(**t**)]

+ Dg(**t**) [Sg(i,j)(**t**) S<g(**t**) + Sg(i)(**t**)] S<g(j)(**t**) + Sg(j)(**t**) S<g(i)(**t**) + Sg(**t**) S<g(i,j)(**t**)]

+ Dg(j)(**t**) [ Sg(i)(**t**) S<g(**t**) + Sg(**t**) S<g(i)(**t**) ]

+ Dg(i)(**t**) [ Sg(j)(**t**) S<g(**t**) + Sg(**t**) S<g(j)(**t**) ] + Dg(i,j)(**t**) Sg(**t**) S<g(**t**)

+ SH [ Sg(i,j)(**t**) Dg(**t**) + Sg(i)(**t**) Dg(j)(**t**) + Sg(j)(**t**) Dg(i)(**t**) + Sg(**t**) Dg(i,j)(**t**) ]

+ [ Sg(i,j)(**t**) Tg(**t**) + Sg(i)(**t**) Tg(j)(**t**)  + Sg(j)(**t**) Tg(i)(**t**)  + Sg(**t**) Tg(i,j)(**t**) ]

+ **Z**2(i,j)[Dg;**t**] } ;

(E.1)

This completes the expression for the term with D=2g. Similarly, for the term (D=2g1) representing center-bond structures one has

P2g1(i,j)(**t**) = **Z**2(i,j)[Sg;**t**] + **Z**2(i,j)[Dg;**t**] + **Z**2(i,j)[Tg;**t**] ; (E.2)

Above the following notation has been used

**Z**4(i,j) [Sg;**t**] = (1/24){[ 4(3(Sg(**t**))2 Sg(j)(**t**) Sg(i)(**t**) + (Sg(**t**))3 Sg(i,j)(**t**)) ]

+ 6[2Sg(**t**) Sg(j)(**t**) 2Sg(i)(**t**2) + (Sg(**t**))2 4Sg(i,j)(**t**2) + 2Sg(j)(**t**) Sg(i)(**t**) Sg(**t**2)

+ 2Sg(**t**) Sg(i,j)(**t**) Sg(**t**2) + 2Sg(**t**) Sg(i)(**t**) 2Sg(j)(**t**2) ]

+ 8[Sg(**t**) 9Sg(i,j)(**t**3) + Sg(j)(**t**) 3Sg(i)(**t**3) + Sg(i)(**t**) 3Sg(j)(**t**3) + Sg(i,j)(**t**) Sg(**t**3)]

+ 6[ 2Sg(j)(**t**2) 2Sg(i)(**t**2) + Sg(**t**2) 4Sg(i,j)(**t**2) ] + 6[ 16Sg(i,j)(**t**4)] } ;

(E.3)

**Z**3(i,j)[Sg;**t**] = (1/6){ 6Sg(**t**) Sg(j)(**t**) Sg(i)(**t**) + 3(Sg(**t**))2 Sg(i,j)(**t**) +

+ 3[Sg(**t**) 4Sg(i,j)(**t**2) + Sg(j)(**t**) 2Sg(i)(**t**2) + Sg(i)(**t**) 2Sg(j)(**t**2) + Sg(i,j)(**t**) Sg(**t**2)]

+ 2 [ 9Sg(i,j)(**t**3) ] } ; (E.4)

**Z**2(i,j)[Sg;**t**] = (1/2){2Sg(j)(**t**) Sg(i)(**t**) + 2Sg(**t**) Sg(i,j)(**t**) + 4Sg(i,j)(**t**2) };

(E.5)

**Appendix F. Recursion Relations for Second-Derivative Generating**

#### Functions for “rooted” trees

From the results given in **Appendix A**, one derives the analytical expressions for second-derivative generating functions representing “rooted” tree structures.

Sg+1(i,j)(**t**) = t{ Sg+1,j(i)(**t**) + Sg+1,i(j)(**t**) + **Z**3(i,j)[Sg;**t**] +

[Sg(i,j)(**t**) **Z**2[S<g;**t**] + Sg(i)(**t**) **Z**2(j)[S<g;**t**] + Sg(j)(**t**) **Z**2(i)[S<g;**t**] + Sg(**t**) **Z**2(i,j)[S<g;**t**] ]

+ [S<g(i,j)(**t**) **Z**2[Sg;**t**] + S<g(i)(**t**) **Z**2(j)[Sg;**t**] + S<g(j)(**t**)**Z**2(i)[Sg;**t**] + S<g(**t**) **Z**2(i,j)[Sg;**t**]]

+ SH [ Sg(i,j) (**t**) S<g(**t**) + Sg(i)(**t**) S<g(j)(**t**) + Sg(j)(**t**)S<g(i)(**t**) + Sg(**t**) S<g(i,j)(**t**)]

+ SH **Z**2(i,j) [Sg;**t**] + SH2 Sg(i,j)(**t**) + Dg(**t**) [Sg(i,j)(**t**) + S<g(i,j)(**t**)]

+ Dg(j)(**t**) [ Sg(i)(**t**) + S<g(i)(**t**)] + Dg(i)(**t**) [ Sg(j)(**t**)  + S<g(j)(**t**)]

+ Dg(i,j)(**t**) [ Sg(**t**) + S<g(**t**) ] + SH Dg(i,j)(**t**) + Tg(i,j)(**t**) } ; (F.1)

Dg+1(i,j)(**t**) = t { Dg+1,j(i)(**t**) + Dg+1,i(j)(**t**) + **Z**2(i,j)[Sg;**t**] +

[ Sg(i,j)(**t**) S<g(**t**) + Sg(i)(**t**) S<g(j)(**t**) + Sg(j)(**t**) S<g(i)(**t**) + Sg(**t**) S<g(i,j)(**t**)]

+ SH Sg(i,j)(**t**) + Dg(i,j)(**t**) } ; (F.2)

Tg+1(i,j)(**t**) = t { Tg+1,j(i)(**t**) + Tg+1,i(j)(**t**) + Sg(i,j)(**t**) }; (F.3)

This completes the listing of the second-derivative generating functions for all acyclic hydrocarbons.
